# Supplementary material for: Variations in Multiple Syndromic Deafness Genes Mimic Non-syndromic Hearing Loss
Source: PubMed Central journal article supplement (PMC4999867; doi:10.1038/srep31622), 2016-08-26
Supplement: srep31622-s1.pdf [file srep31622-s1.pdf]

## SUPPLEMENTARY INFORMATION

### Variations in Multiple Syndromic Deafness Genes Mimic Non-syndromic Hearing Loss

Guney Bademci<sup>1</sup>, Filiz B. Cengiz<sup>1</sup>, Joseph Foster II<sup>1</sup>, Duygu Duman<sup>2</sup>, Levent Sennaroglu<sup>3</sup>, Oscar Diaz-Horta<sup>1</sup>, Tahir Atik<sup>4</sup>, Tayfun Kirazli<sup>5</sup>, Levent Olgun<sup>6</sup>, Hudaver Alper<sup>7</sup>, Ibis Menendez<sup>1</sup>, Ilayda Loclar<sup>8</sup>, Gonca Sennaroglu<sup>9</sup>, Suna Tokgoz-Yilmaz<sup>9</sup>, Shengru Guo<sup>1</sup>, Yuksel Olgun<sup>6</sup>, Nejat Mahdieh<sup>10</sup>, Mortaza Bonyadi<sup>11</sup>, Nazim Bozan<sup>12</sup>, Abdurrahman Ayril<sup>12</sup>, Ferda Ozkinay<sup>4</sup>, Muzeeyen Yildirim-Baylan<sup>13</sup>, Susan H. Blanton<sup>1,14</sup>, Mustafa Tekin<sup>1,14\*</sup>

- 1) John P. Hussman Institute for Human Genomics, University of Miami, Miami, 33136, FL, USA,
- 2) Division of Genetics, Department of Pediatrics, Ankara University School of Medicine, Ankara, 06620, Turkey
- 3) Department of Otolaryngology, Hacettepe University School of Medicine, Ankara, 06100, Turkey
- 4) Division of Genetics, Department of Pediatrics, Ege University School of Medicine, Izmir, 35100, Turkey
- 5) Department of Otolaryngology, Ege University School of Medicine, Izmir, 35100, Turkey
- 6) Department of Otorhinolaryngology, Bozyaka Training and Research Hospital, Bozyaka, Izmir, 35170, Turkey
- 7) Department of Radiology, Ege University School of Medicine, Izmir, 35100, Turkey
- 8) Koc University School of Medicine, Istanbul, 34450, Turkey
- 9) Department of Audiology, Hacettepe University Health Sciences Faculty, Ankara, 06100, Turkey
- 10) Rajaie Cardiovascular Medical and Research Center, Iran University of Medical Sciences, Tehran, Iran
- 11) Faculty of Natural Sciences, Center of Excellence for Biodiversity, University of Tabriz, Tabriz, Iran
- 12) Department of Otolaryngology, Faculty of Medicine, Yuzuncu Yil University, Van, 65080, Turkey
- 13) Department of Otorhinolaryngology, Dicle University School of Medicine, Diyarbakir, 21280, Turkey
- 14) Dr. John T. Macdonald Foundation Department of Human Genetics and Department of Otolaryngology, University of Miami, Miami, 33136, FL, USA

**Corresponding author:** Mustafa Tekin, M.D, 1501 NW 10th Avenue, BRB-610 (M-860), Miami, FL, 33136 Phone: 305-243-2381, E-mail: mtekin@miami.edu

**Table S1:** List of the NSHL genes prescreened via whole exome sequencing\*

|                                       | <b>Gene (MIM ID)</b>                                                                                                                                                                                                                                                                                                                                                                                                                                                                                                                                                                                                                                                                                                                                                                                                                                                                                                                                                                                                                                                                                                                                                                                                                                                                                                                                                                                                                                                                                                                                                                                                               |
|---------------------------------------|------------------------------------------------------------------------------------------------------------------------------------------------------------------------------------------------------------------------------------------------------------------------------------------------------------------------------------------------------------------------------------------------------------------------------------------------------------------------------------------------------------------------------------------------------------------------------------------------------------------------------------------------------------------------------------------------------------------------------------------------------------------------------------------------------------------------------------------------------------------------------------------------------------------------------------------------------------------------------------------------------------------------------------------------------------------------------------------------------------------------------------------------------------------------------------------------------------------------------------------------------------------------------------------------------------------------------------------------------------------------------------------------------------------------------------------------------------------------------------------------------------------------------------------------------------------------------------------------------------------------------------|
| <b>Autosomal Recessive NSHL genes</b> | <i>ADCY1</i> (MIM 103072), <i>BDP1</i> (MIM 607012), <i>CABP2</i> (MIM 607314), <i>CDH23</i> (MIM 605516), <i>CIB2</i> (MIM 605564), <i>CLDN14</i> (605608), <i>CLIC5</i> (MIM 607293), <i>COL11A2</i> (MIM 120290), <i>ELMOD3</i> (MIM 615427), <i>EPS8</i> (MIM 600206), <i>ESPN</i> (MIM 606351), <i>ESRRB</i> (MIM 602167), <i>FAM65B</i> (MIM 611410), <i>GIPC3</i> (MIM 608792), <i>GJB2</i> (MIM 121011), <i>GJB3</i> (MIM 603324), <i>GJB6</i> (MIM 604418), <i>GPR98</i> (MIM 602851), <i>GRXCR1</i> (MIM 613283), <i>GRXCR2</i> (MIM 615762), <i>HGF</i> (MIM 142409), <i>ILDR1</i> (MIM 609739), <i>KARS</i> (MIM 601421), <i>LHFPL5</i> (MIM 609427), <i>LOXHD1</i> (MIM 613072), <i>LRTOMT</i> (MIM 612414), <i>MARVELD2</i> (MIM 610572), <i>MSRB3</i> (MIM 613719), <i>MYO15A</i> (MIM 602666), <i>MYO3A</i> (MIM 606808), <i>MYO6</i> (MIM 600970), <i>MYO7A</i> (MIM 276903), <i>OSBPL2</i> (MIM 606731), <i>OTOA</i> (MIM 607038), <i>OTOF</i> (MIM 603681), <i>OTOG</i> (MIM 604487), <i>OTOGL</i> (MIM 614925), <i>PCDH15</i> (MIM 605514), <i>PJKV</i> (MIM 610219), <i>PNPT1</i> (MIM 610316), <i>PTPRQ</i> (MIM 603317), <i>RDY</i> (MIM 179410), <i>SERPINB6</i> (MIM 173321), <i>SLC26A4</i> (MIM 605646), <i>SLC26A5</i> (MIM 604943), <i>STRC</i> (MIM 606440), <i>SYNE4</i> (MIM 615535), <i>TBC1D24</i> (MIM 613577), <i>TECTA</i> (MIM 602574), <i>TMC1</i> (MIM 606706), <i>TMIE</i> (MIM 607237), <i>TMPRSS3</i> (MIM 605511), <i>TPRN</i> (MIM 613354), <i>TRIOBP</i> (MIM 609761), <i>TSPEAR</i> (MIM 612920), <i>USH1C</i> (MIM 605242), <i>USH1G</i> (MIM 607696) and <i>WHRN</i> (MIM 607928) |
| <b>Autosomal Dominant NSHL genes</b>  | <i>ACTG1</i> (MIM 102560), <i>CCDC50</i> (MIM 611051), <i>CEACAM16</i> (MIM 614591), <i>COCH</i> (MIM 603196), <i>COL11A2</i> (MIM 120290), <i>CRYM</i> (MIM 123740), <i>DFNA5</i> (MIM 608798), <i>DIAPH1</i> (MIM 602121), <i>EYA4</i> (MIM 603550), <i>GJB2</i> (MIM 121011), <i>GJB3</i> (MIM 603324), <i>GJB6</i> (MIM 604418), <i>GRHL2</i> (MIM 608576), <i>HOMER2</i> (MIM 604799), <i>KCNQ4</i> (MIM 603537), <i>MYH14</i> (MIM 608568), <i>MYH9</i> (MIM 160775), <i>MYO6</i> (MIM 600970), <i>MYO7A</i> (MIM 276903), <i>OSBPL2</i> (MIM 606731), <i>P2RX2</i> (MIM 600844), <i>POU4F3</i> (MIM 602460), <i>SIX1</i> (MIM 601205), <i>SLC17A8</i> (MIM 607557), <i>SMAC/DIABLO</i> (MIM 605219), <i>TBC1D24</i> (MIM 613577), <i>TECTA</i> (MIM 602574), <i>TJP2</i> (MIM 607709), <i>TMC1</i> (MIM 606706), <i>TNC</i> (MIM 187380) and <i>WFS1</i> (MIM 606201)                                                                                                                                                                                                                                                                                                                                                                                                                                                                                                                                                                                                                                                                                                                                                       |
| <b>X-Linked NSHL genes</b>            | <i>COL4A6</i> (MIM 303631), <i>POU3F4</i> (MIM 300039), <i>PRPS1</i> (MIM 311850) and <i>SMPX</i> (MIM 300226)                                                                                                                                                                                                                                                                                                                                                                                                                                                                                                                                                                                                                                                                                                                                                                                                                                                                                                                                                                                                                                                                                                                                                                                                                                                                                                                                                                                                                                                                                                                     |

\*The gene list is created by using [www.hereditaryhearingloss.org](http://www.hereditaryhearingloss.org) and OMIM (<http://omim.org/>)

**Table S2.** Diagnostic Criteria for Waardenburg Syndrome Type II\*

| <b>Criteria WS Type II</b>                                                                               | <b>Proband<br/>78</b> | <b>Proband<br/>94</b> |
|----------------------------------------------------------------------------------------------------------|-----------------------|-----------------------|
| <b>1.</b> Congenital sensorineural hearing loss                                                          | +                     | +                     |
| <b>2.</b> Pigmentary disturbances of iris                                                                | -                     | -                     |
| <b>a.</b> Complete heterochromia iridum-two eyes of different color                                      | -                     | -                     |
| <b>b.</b> Partial or segmental heterochromia- segments of blue or brown pigmentation in one or both eyes | -                     | -                     |
| <b>c.</b> Hypoplastic blue eyes-characteristic brilliant blue in both eyes                               | -                     | -                     |
| <b>3.</b> Pigmentary disturbances of the hair                                                            | -                     | -                     |
| <b>a.</b> White forelock from birth or in teens                                                          | -                     | -                     |
| <b>b.</b> Premature greying before age 30 years                                                          | -                     | -                     |
| <b>4.</b> A first or second degree relative with two or more of criteria 1-3                             | -                     | -                     |

\*A person should fulfill at least two of the criteria to be counted as affected.

**Table S2 Reference:** Liu, X.Z., Newton, V.E. & Read, A.P. Waardenburg syndrome type II: phenotypic findings and diagnostic criteria. *Am J Med Genet* **55**, 95-100 (1995).

**Table S3.** CHARGE Syndrome Diagnostic Criteria (Verloes Criteria)\*

|                                                                                                                  | <b>Proband 694</b>        |
|------------------------------------------------------------------------------------------------------------------|---------------------------|
| <b>Major signs (“the 3 C”)</b>                                                                                   |                           |
| Coloboma (iris or choroid, with or without microphthalmia)                                                       | -                         |
| Atresia of Choanae                                                                                               | -                         |
| Hypoplastic semi-circular Canals                                                                                 | +                         |
| <b>Minor signs</b>                                                                                               |                           |
| Rhombencephalic dysfunction (brainstem dysfunctions, cranial nerve VII to XII palsies and neurosensory deafness) | + (neurosensory deafness) |
| Hypothalamo-hypophyseal dysfunction (including GH and gonadotrophin deficiencies)                                | -                         |
| Abnormal middle or external ear                                                                                  | -                         |
| Malformation of mediastinal organs (heart, esophagus)                                                            | -                         |
| Mental retardation                                                                                               | -                         |

\*Inclusion rule;

**Typical CHARGE:** 3 majors signs or 2/3 major signs + 2/5 minor signs

**Partial/incomplete CHARGE:** 2/3 major + 1/5 minor

**Atypical CHARGE:** 2/3 major + 0/5 minor or 1/3 major + 3/5 minors

**Table S3 Reference:** Verloes, A. Updated diagnostic criteria for CHARGE syndrome: a proposal. Am J Med Genet A **133A**, 306-8 (2005).

**Table S4.** Diagnostic criteria for Noonan syndrome (NS)

| <b>Feature</b>          | <b>A = Major</b>                                           | <b>B = Minor</b>                                               | <b>Proband 713</b> |
|-------------------------|------------------------------------------------------------|----------------------------------------------------------------|--------------------|
| <b>1</b> Facial         | Typical face dysmorphism                                   | Suggestive face dysmorphism                                    | 1B                 |
| <b>2</b> Cardiac        | Pulmonary valve stenosis, HOCM and/or ECG typical of NS    | Other defect                                                   | -                  |
| <b>3</b> Height         | <P3*                                                       | <P10*                                                          | -                  |
| <b>4</b> Chest wall     | Pectus carinatum/excavatum                                 | Broad thorax                                                   | -                  |
| <b>5</b> Family history | First degree relative with definite NS                     | First degree relative with suggestive NS                       | -                  |
| <b>6</b> Other          | Mental retardation, cryptorchidism and lymphatic dysplasia | One of mental retardation, cryptorchidism, lymphatic dysplasia | -                  |

HOCM: hypertrophic obstructive cardiomyopathy;

\*P3 and P10 refer to percentile lines for height according to age, with the normal range of variation defined as P3-P97 inclusive

Definitive NS: 1 "A" plus one other major sign or two minor signs; 1 "B" plus two major signs or three minor signs

**Table S4 Reference:** van der Burgt, I. Noonan syndrome. *Orphanet J Rare Dis* **2**, 4 (2007).

**Table S5.** Diagnostic Criteria of the Kabuki Syndrome (five cardinal symptoms of Kabuki syndrome)

| <b>Typical facial features:</b>                                                                                                                                                                                | <b>Proband 859</b> |
|----------------------------------------------------------------------------------------------------------------------------------------------------------------------------------------------------------------|--------------------|
| Elongated palpebral fissures with eversion of the lateral third of the lower eyelid                                                                                                                            | -                  |
| Arched and broad eyebrows with the lateral third displaying sparseness or notching                                                                                                                             | -                  |
| Short columella with depressed nasal tip                                                                                                                                                                       | -                  |
| Large, prominent, or cupped ears                                                                                                                                                                               | -                  |
| <b>Skeletal anomalies:</b>                                                                                                                                                                                     |                    |
| Spinal column abnormalities, including sagittal cleft vertebrae, butterfly vertebrae, narrow intervertebral disc space, and/or scoliosis                                                                       | -                  |
| Brachydactyly V                                                                                                                                                                                                | -                  |
| Brachymesophalangy                                                                                                                                                                                             | -                  |
| Clinodactyly of fifth digits                                                                                                                                                                                   | -                  |
| <b>Dermatoglyphic abnormalities:</b> persistence of fetal fingertip pads                                                                                                                                       | -                  |
| Note: While absence of digital triradius c and/or d and increased digital loop and hypothenar loop patterns can be observed, this type of analysis is not routinely done in clinical practice in most centers. | -                  |
| <b>Mild to moderate intellectual disability</b>                                                                                                                                                                | -                  |
| <b>Postnatal growth deficiency</b>                                                                                                                                                                             | -                  |

**Table S5 Reference:** Niikawa, N. et al. Kabuki make-up (Niikawa-Kuroki) syndrome: a study of 62 patients. Am J Med Genet **31**, 565-89 (1988).
